# Supplementary material
Source: publisher figshare collection journal article supplement (https://tandf.figshare.com/ndownloader/files/12469790)
Supplement: Supplementary file 1 [file 12469790]

**Laboratory work-up:**

1. Homeostatic Model Assessment of Insulin Resistance (HOMA-IR) was calculated using the following formula: Fasting Insulin X Fasting Glucose)/22.5.
2. Quantitative Insulin Sensitivity Check Index (QUICKI) was calculated using the following formula:1/[log(Fasting Glucose)+log(Fasting Insulin)].
3. Preparation for ELISA analysis:
   1. Drawing blood to EDTA test tubes
   2. Centrifugation within 30 minutes at 1000g speed for 15 minutes.
   3. Collecting the plasma and freezing at -20°C.
4. All ELISA analyses were performed using Quantikine® ELISA kits (R&D Systems, Inc. Minneapolis, MN, USA).

Adiponectin: Human Total Adiponectin/Acrp30 Immunoassay (CN DRP300).

1. 100-fold dilution: 10 μL of plasma + 990 μL of Calibrator Diluent RD6-39.
2. Preparation of dilution series: 3.9 ng/ml, 7.8 ng/ml, 15.6 ng/ml, 31.2 ng/ml, 62.5 ng/ml and 125 ng/ml.
3. First stage: 100 μL of Assay Diluent RD1W + 50 μL of standard, control, or sample per well. Each sample was added to 2 wells for control purposes.
4. Incubation: 2 hours at room temperature.
5. Aspiration and wash with 400 μL of was buffer X 4 times.
6. Second stage: 200 μL of Human Adiponectin Conjugate in each well.
7. Incubation: 2 hours at room temperature
8. Aspiration and wash with 400 μL of was buffer X 4 times.
9. Third stage: 200 μL of Substrate Solution to each well.
10. Incubation: 30 minutes at room temperature (with light protection).
11. Final stage: 50 μL of Stop Solution to each well.
12. Determining optical density and producing results.

Chemerin: Human Chemerin Immunoassay (CN DCHM00).

1. 100-fold dilution: 50 μL of plasma + 200 μL of Calibrator Diluent RD5-26, mixing and re-dilution with 20 μL of sample and 380 μL of Calibrator Diluent RD5-26.
2. Preparation of dilution series: 78 pg/ml, 156 pg/ml, 313 pg/ml, 625 pg/ml, 1,250 pg/ml, 2,500 pg/ml and 5,000 pg/ml.
3. First stage: 100 μL of Assay Diluent RD1-21 + 50 μL of standard, control, or sample per well. Each sample was added to 2 wells for control purposes.
4. Incubation: 2 hours at room temperature on microplate shaker (500RPM).
5. Aspiration and wash with 400 μL of was buffer X 4 times.
6. Second stage: 200 μL of Chemerin Conjugate in each well.
7. Incubation: 1 hour at room temperature on microplate shaker (500RPM).
8. Aspiration and wash with 400 μL of was buffer X 4 times.
9. Third stage: 200 μL of Substrate Solution to each well.
10. Incubation: 30 minutes at room temperature (with light protection).
11. Final stage: 50 μL of Stop Solution to each well.
12. Determining optical density and producing results.

Leptin: Human Leptin Immunoassay (CN DLP00).

1. 100-fold dilution: 10 μL of plasma + 990 μL of Calibrator Diluent RD5P.
2. Preparation of dilution series: 15.6 pg/ml, 31.3 pg/ml, 62.5 pg/ml, 125 pg/ml, 250 pg/ml, 500 pg/ml and 1,000 pg/ml.
3. First stage: 100 μL of Assay Diluent RD1-19 + 100 μL of standard, control, or sample per well. Each sample was added to 2 wells for control purposes.
4. Incubation: 2 hours at room temperature.
5. Aspiration and wash with 400 μL of was buffer X 4 times.
6. Second stage: 200 μL of Human Leptin Conjugate in each well.
7. Incubation: 2 hours at room temperature.
8. Aspiration and wash with 400 μL of was buffer X 4 times.
9. Third stage: 200 μL of Substrate Solution to each well.
10. Incubation: 30 minutes at room temperature (with light protection).
11. Final stage: 50 μL of Stop Solution to each well.
12. Determining optical density and producing results.

RBP-4: Human RBP4 Immunoassay (CN DRB400)

1. 1000-fold dilution: 20 μL of plasma + 980 μL of Calibrator Diluent RD5-50, mixing and re-dilution with 25 μL of sample and 475 μL of Calibrator Diluent RD5-50.
2. Preparation of dilution series: 1.56 ng/ml, 3.12 ng/ml, 6.25 ng/ml, 12.5 ng/ml, 25 ng/ml, 50 ng/ml and 100 ng/ml.
3. First stage: 100 μL of Assay Diluent RD1-118 + 20 μL of standard, control, or sample per well. Each sample was added to 2 wells for control purposes.
4. Incubation: 1 hour at room temperature on microplate shaker (500RPM).
5. Aspiration and wash with 400 μL of was buffer X 4 times.
6. Second stage: 200 μL of RBP4 Conjugate in each well.
7. Incubation: 1 hour at room temperature on microplate shaker (500RPM).
8. Aspiration and wash with 400 μL of was buffer X 4 times.
9. Third stage: 200 μL of Substrate Solution to each well.
10. Incubation: 30 minutes at room temperature (with light protection).
11. Final stage: 50 μL of Stop Solution to each well.
12. Determining optical density and producing results.

Resistin: Human Resistin Immunoassay (CN DRSN00).

1. 5-fold dilution: 60 μL of plasma + 240 μL of Calibrator Diluent RD5K.
2. Preparation of dilution series: 0.156 pg/ml, 0.313 pg/ml, 0.625 pg/ml, 1.25 pg/ml, 2.50 pg/ml, 5 pg/ml and 10 pg/ml.
3. First stage: 100 μL of Assay Diluent RD1-19 + 100 μL of standard, control, or sample per well. Each sample was added to 2 wells for control purposes.
4. Incubation: 2 hours at room temperature.
5. Aspiration and wash with 400 μL of was buffer X 4 times.
6. Second stage: 200 μL of Resistin Conjugate in each well.
7. Incubation: 2 hours at room temperature.
8. Aspiration and wash with 400 μL of was buffer X 4 times.
9. Third stage: 200 μL of Substrate Solution to each well.
10. Incubation: 30 minutes at room temperature (with light protection).
11. Final stage: 50 μL of Stop Solution to each well.
12. Determining optical density and producing results.

Osteocalcin: Human Osteocalcin Immunoassay (CN DSTCN0).

1. Preparation of dilution series: 2 ng/ml, 4 ng/ml, 8 ng/ml, 16 ng/ml, 32 ng/ml and 64 ng/ml.
2. First stage: 100 μL of Assay Diluent RD1-17 + 50 μL of standard, control, or sample per well. Each sample was added to 2 wells for control purposes.
3. Incubation: 2 hours at room temperature on microplate shaker (500 RPM).
4. Aspiration and wash with 400 μL of was buffer X 4 times.
5. Second stage: 200 μL of Osteocalcin Conjugate in each well.
6. Incubation: 2 hours at room temperature on microplate shaker (500 RPM).
7. Aspiration and wash with 400 μL of was buffer X 4 times.
8. Third stage: 200 μL of Substrate Solution to each well.
9. Incubation: 30 minutes at room temperature (with light protection).
10. Final stage: 50 μL of Stop Solution to each well.
11. Determining optical density and producing results.

**Supplementary figure legend:**

Figure s1 - ROC curve of the Resistin, Adiponectin, Osteocalcin and QUICKI for the prediction of the need for medications in order to achieve good glycemic control

Figure s2 - ROC curve of the Leptin, RBP-4, Chemerin and HOMA-IR for the prediction of the need for medications in order to achieve good glycemic control

Figure s3 - ROC curve of the first trimester fasting glucose, first visit fasting glucose and OGTT fasting glucose for the prediction of the need for medications in order to achieve good glycemic control

**Test characteristics**

| Test Result Variable(s) | Positive if Greater Than or Equal Toa | Sens | Spec | PPV | NPV | LR (+) | LR (-) |
| --- | --- | --- | --- | --- | --- | --- | --- |
| First trimester fasting glucose | 68.00 | 100.00% | 2.30% | 35.20% | 100.00% | 1.02 | 0.00 |
| 70.50 | 100.00% | 4.50% | 35.72% | 100.00% | 1.05 | 0.00 |
| 72.50 | 100.00% | 6.80% | 36.28% | 100.00% | 1.07 | 0.00 |
| 73.50 | 100.00% | 9.10% | 36.86% | 100.00% | 1.10 | 0.00 |
| 74.50 | 100.00% | 13.60% | 38.05% | 100.00% | 1.16 | 0.00 |
| 75.50 | 95.00% | 20.50% | 38.80% | 88.54% | 1.19 | 0.24 |
| 77.00 | 95.00% | 29.50% | 41.69% | 91.75% | 1.35 | 0.17 |
| 79.00 | 85.00% | 34.10% | 40.63% | 81.08% | 1.29 | 0.44 |
| 80.50 | 80.00% | 40.90% | 41.80% | 79.40% | 1.35 | 0.49 |
| 81.50 | 70.00% | 54.50% | 44.94% | 77.39% | 1.54 | 0.55 |
| 82.50 | 60.00% | 54.50% | 41.17% | 71.97% | 1.32 | 0.73 |
| 83.50 | 60.00% | 59.10% | 43.77% | 73.58% | 1.47 | 0.68 |
| 84.50 | 55.00% | 61.40% | 43.05% | 72.00% | 1.42 | 0.73 |
| 85.50 | 55.00% | 68.20% | 47.85% | 74.07% | 1.73 | 0.66 |
| 86.50 | 50.00% | 72.70% | 49.29% | 73.26% | 1.83 | 0.69 |
| 87.50 | 50.00% | 75.00% | 51.49% | 73.87% | 2.00 | 0.67 |
| 88.50 | 40.00% | 81.80% | 53.84% | 71.98% | 2.20 | 0.73 |
| 89.50 | 35.00% | 86.40% | 57.73% | 71.47% | 2.57 | 0.75 |
| 91.00 | 35.00% | 88.60% | 61.96% | 71.98% | 3.07 | 0.73 |
| 92.35 | 25.00% | 88.60% | 53.78% | 69.01% | 2.19 | 0.85 |
| 93.85 | 25.00% | 90.90% | 59.31% | 69.55% | 2.75 | 0.83 |
| 95.50 | 20.00% | 90.90% | 53.84% | 68.17% | 2.20 | 0.88 |
| 96.50 | 20.00% | 93.20% | 60.95% | 68.71% | 2.94 | 0.86 |
| 98.00 | 15.00% | 93.20% | 53.93% | 67.39% | 2.21 | 0.91 |
| 100.00 | 15.00% | 95.50% | 63.88% | 67.92% | 3.33 | 0.89 |
| 102.00 | 15.00% | 97.70% | 77.58% | 68.42% | 6.52 | 0.87 |
| 103.50 | 10.00% | 97.70% | 69.76% | 67.17% | 4.35 | 0.92 |
| OGTT Fasting glucose | 72.50 | 100.00% | 2.30% | 35.20% | 100.00% | 1.02 | 0.00 |
| 74.50 | 100.00% | 4.50% | 35.72% | 100.00% | 1.05 | 0.00 |
| 76.00 | 100.00% | 6.80% | 36.28% | 100.00% | 1.07 | 0.00 |
| 77.50 | 100.00% | 11.40% | 37.46% | 100.00% | 1.13 | 0.00 |
| 78.50 | 100.00% | 15.90% | 38.69% | 100.00% | 1.19 | 0.00 |
| 79.50 | 95.00% | 20.50% | 38.80% | 88.54% | 1.19 | 0.24 |
| 80.50 | 95.00% | 29.50% | 41.69% | 91.75% | 1.35 | 0.17 |
| 81.50 | 95.00% | 34.10% | 43.34% | 92.78% | 1.44 | 0.15 |
| 82.50 | 95.00% | 40.90% | 46.03% | 93.91% | 1.61 | 0.12 |
| 83.50 | 85.00% | 45.50% | 45.28% | 85.11% | 1.56 | 0.33 |
| 84.50 | 80.00% | 52.30% | 47.09% | 83.13% | 1.68 | 0.38 |
| 85.50 | 80.00% | 59.10% | 50.93% | 84.78% | 1.96 | 0.34 |
| 86.50 | 75.00% | 61.40% | 50.76% | 82.23% | 1.94 | 0.41 |
| 87.50 | 75.00% | 63.60% | 52.23% | 82.74% | 2.06 | 0.39 |
| 88.50 | 70.00% | 70.50% | 55.73% | 81.58% | 2.37 | 0.43 |
| 89.50 | 70.00% | 75.00% | 59.77% | 82.49% | 2.80 | 0.40 |
| 90.50 | 60.00% | 75.00% | 56.01% | 77.94% | 2.40 | 0.53 |
| 91.50 | 60.00% | 77.30% | 58.38% | 78.46% | 2.64 | 0.52 |
| 92.50 | 55.00% | 77.30% | 56.25% | 76.40% | 2.42 | 0.58 |
| 93.50 | 55.00% | 79.50% | 58.74% | 76.90% | 2.68 | 0.57 |
| 94.50 | 55.00% | 81.80% | 61.59% | 77.41% | 3.02 | 0.55 |
| 96.00 | 55.00% | 86.40% | 68.21% | 78.35% | 4.04 | 0.52 |
| 98.50 | 55.00% | 88.60% | 71.91% | 78.77% | 4.82 | 0.51 |
| 100.50 | 45.00% | 88.60% | 67.68% | 75.22% | 3.95 | 0.62 |
| 101.50 | 40.00% | 90.90% | 69.99% | 74.06% | 4.40 | 0.66 |
| 102.50 | 30.00% | 93.20% | 70.07% | 71.50% | 4.41 | 0.75 |
| 103.50 | 30.00% | 95.50% | 77.96% | 72.00% | 6.67 | 0.73 |
| 106.00 | 20.00% | 97.70% | 82.19% | 69.71% | 8.70 | 0.82 |
| 108.50 | 15.00% | 97.70% | 77.58% | 68.42% | 6.52 | 0.87 |
| 109.50 | 10.00% | 97.70% | 69.76% | 67.17% | 4.35 | 0.92 |
| 111.50 | 5.00% | 97.70% | 53.56% | 65.97% | 2.17 | 0.97 |
| 157.50 | 0.00% | 97.70% | 0.00% | 64.80% | 0.00 | 1.02 |
| First visit fasting glucose | 52.00 | 100.00% | 2.30% | 35.20% | 100.00% | 1.02 | 0.00 |
| 53.50 | 100.00% | 4.50% | 35.72% | 100.00% | 1.05 | 0.00 |
| 55.00 | 100.00% | 6.80% | 36.28% | 100.00% | 1.07 | 0.00 |
| 58.00 | 100.00% | 9.10% | 36.86% | 100.00% | 1.10 | 0.00 |
| 60.50 | 100.00% | 11.40% | 37.46% | 100.00% | 1.13 | 0.00 |
| 62.00 | 100.00% | 13.60% | 38.05% | 100.00% | 1.16 | 0.00 |
| 63.50 | 100.00% | 15.90% | 38.69% | 100.00% | 1.19 | 0.00 |
| 64.50 | 100.00% | 18.20% | 39.35% | 100.00% | 1.22 | 0.00 |
| 65.50 | 95.00% | 20.50% | 38.80% | 88.54% | 1.19 | 0.24 |
| 66.50 | 95.00% | 29.50% | 41.69% | 91.75% | 1.35 | 0.17 |
| 67.50 | 90.00% | 29.50% | 40.38% | 84.76% | 1.28 | 0.34 |
| 69.00 | 85.00% | 31.80% | 39.81% | 79.98% | 1.25 | 0.47 |
| 70.50 | 80.00% | 31.80% | 38.36% | 74.98% | 1.17 | 0.63 |
| 71.50 | 80.00% | 36.40% | 40.03% | 77.43% | 1.26 | 0.55 |
| 72.50 | 80.00% | 38.60% | 40.88% | 78.44% | 1.30 | 0.52 |
| 73.50 | 75.00% | 43.20% | 41.20% | 76.51% | 1.32 | 0.58 |
| 74.50 | 70.00% | 47.70% | 41.53% | 74.98% | 1.34 | 0.63 |
| 76.50 | 65.00% | 47.70% | 39.74% | 71.98% | 1.24 | 0.73 |
| 78.50 | 65.00% | 59.10% | 45.75% | 76.09% | 1.59 | 0.59 |
| 79.50 | 65.00% | 70.50% | 53.90% | 79.15% | 2.20 | 0.50 |
| 80.50 | 60.00% | 75.00% | 56.01% | 77.94% | 2.40 | 0.53 |
| 81.50 | 60.00% | 79.50% | 60.83% | 78.93% | 2.93 | 0.50 |
| 82.50 | 55.00% | 84.10% | 64.73% | 77.89% | 3.46 | 0.54 |
| 83.50 | 55.00% | 86.40% | 68.21% | 78.35% | 4.04 | 0.52 |
| 84.50 | 50.00% | 90.90% | 74.46% | 77.41% | 5.49 | 0.55 |
| 86.00 | 50.00% | 93.20% | 79.60% | 77.84% | 7.35 | 0.54 |
| 88.00 | 45.00% | 93.20% | 77.83% | 76.15% | 6.62 | 0.59 |
| 89.50 | 40.00% | 93.20% | 75.74% | 74.54% | 5.88 | 0.64 |
| 91.00 | 35.00% | 93.20% | 73.20% | 72.99% | 5.15 | 0.70 |
| 92.50 | 35.00% | 97.70% | 88.98% | 73.91% | 15.22 | 0.67 |
| 93.50 | 25.00% | 97.70% | 85.22% | 71.06% | 10.87 | 0.77 |
| 94.50 | 15.00% | 97.70% | 77.58% | 68.42% | 6.52 | 0.87 |
| Mean fasting glucose prior to treatment | 71.43 | 100.00% | 2.30% | 35.20% | 100.00% | 1.02 | 0.00 |
| 72.15 | 100.00% | 4.50% | 35.72% | 100.00% | 1.05 | 0.00 |
| 72.47 | 100.00% | 9.10% | 36.86% | 100.00% | 1.10 | 0.00 |
| 72.55 | 100.00% | 11.40% | 37.46% | 100.00% | 1.13 | 0.00 |
| 72.65 | 95.00% | 11.40% | 36.26% | 81.12% | 1.07 | 0.44 |
| 72.90 | 95.00% | 13.60% | 36.85% | 83.68% | 1.10 | 0.37 |
| 73.27 | 95.00% | 15.90% | 37.48% | 85.70% | 1.13 | 0.31 |
| 73.47 | 95.00% | 18.20% | 38.13% | 87.28% | 1.16 | 0.27 |
| 74.01 | 95.00% | 20.50% | 38.80% | 88.54% | 1.19 | 0.24 |
| 74.58 | 95.00% | 22.70% | 39.47% | 89.54% | 1.23 | 0.22 |
| 74.91 | 95.00% | 25.00% | 40.20% | 90.41% | 1.27 | 0.20 |
| 75.37 | 95.00% | 27.30% | 40.95% | 91.14% | 1.31 | 0.18 |
| 75.56 | 95.00% | 29.50% | 41.69% | 91.75% | 1.35 | 0.17 |
| 75.93 | 95.00% | 31.80% | 42.50% | 92.30% | 1.39 | 0.16 |
| 76.38 | 95.00% | 34.10% | 43.34% | 92.78% | 1.44 | 0.15 |
| 76.52 | 95.00% | 36.40% | 44.21% | 93.21% | 1.49 | 0.14 |
| 77.01 | 95.00% | 38.60% | 45.08% | 93.57% | 1.55 | 0.13 |
| 77.79 | 95.00% | 40.90% | 46.03% | 93.91% | 1.61 | 0.12 |
| 78.30 | 95.00% | 43.20% | 47.02% | 94.21% | 1.67 | 0.12 |
| 78.61 | 95.00% | 45.50% | 48.05% | 94.49% | 1.74 | 0.11 |
| 78.81 | 95.00% | 47.70% | 49.08% | 94.73% | 1.82 | 0.10 |
| 79.08 | 95.00% | 50.00% | 50.20% | 94.96% | 1.90 | 0.10 |
| 79.41 | 95.00% | 52.30% | 51.38% | 95.17% | 1.99 | 0.10 |
| 79.69 | 95.00% | 54.50% | 52.56% | 95.36% | 2.09 | 0.09 |
| 79.88 | 95.00% | 56.80% | 53.85% | 95.54% | 2.20 | 0.09 |
| 80.13 | 95.00% | 59.10% | 55.21% | 95.70% | 2.32 | 0.08 |
| 80.44 | 95.00% | 61.40% | 56.63% | 95.86% | 2.46 | 0.08 |
| 80.65 | 95.00% | 63.60% | 58.07% | 96.00% | 2.61 | 0.08 |
| 80.83 | 95.00% | 65.90% | 59.65% | 96.13% | 2.79 | 0.08 |
| 81.36 | 95.00% | 68.20% | 61.32% | 96.26% | 2.99 | 0.07 |
| 81.87 | 95.00% | 70.50% | 63.08% | 96.37% | 3.22 | 0.07 |
| 81.98 | 95.00% | 72.70% | 64.87% | 96.48% | 3.48 | 0.07 |
| 82.35 | 95.00% | 75.00% | 66.85% | 96.58% | 3.80 | 0.07 |
| 82.81 | 95.00% | 77.30% | 68.95% | 96.68% | 4.19 | 0.06 |
| 83.31 | 95.00% | 79.50% | 71.09% | 96.77% | 4.63 | 0.06 |
| 83.63 | 95.00% | 81.80% | 73.47% | 96.86% | 5.22 | 0.06 |
| 84.03 | 95.00% | 84.10% | 76.02% | 96.94% | 5.97 | 0.06 |
| 84.48 | 95.00% | 86.40% | 78.75% | 97.02% | 6.99 | 0.06 |
| 84.58 | 95.00% | 88.60% | 81.56% | 97.09% | 8.33 | 0.06 |
| 84.91 | 95.00% | 90.90% | 84.71% | 97.16% | 10.44 | 0.06 |
| 85.23 | 95.00% | 93.20% | 88.11% | 97.23% | 13.97 | 0.05 |
| 85.51 | 95.00% | 95.50% | 91.80% | 97.30% | 21.11 | 0.05 |
| 85.99 | 95.00% | 97.70% | 95.64% | 97.36% | 41.30 | 0.05 |
| 87.35 | 90.00% | 97.70% | 95.41% | 94.85% | 39.13 | 0.10 |
| 88.49 | 85.00% | 97.70% | 95.15% | 92.47% | 36.96 | 0.15 |
| 88.93 | 80.00% | 97.70% | 94.86% | 90.20% | 34.78 | 0.20 |
| Leptin | 12873.55 | 95.00% | 2.30% | 34.03% | 46.44% | 0.97 | 2.17 |
| 13190.80 | 95.00% | 4.50% | 34.55% | 62.91% | 0.99 | 1.11 |
| 13541.20 | 95.00% | 6.80% | 35.10% | 71.93% | 1.02 | 0.74 |
| 14691.00 | 95.00% | 9.10% | 35.67% | 77.43% | 1.05 | 0.55 |
| 15867.35 | 90.00% | 9.10% | 34.44% | 63.17% | 0.99 | 1.10 |
| 16422.65 | 90.00% | 11.40% | 35.02% | 68.24% | 1.02 | 0.88 |
| 16743.75 | 90.00% | 13.60% | 35.60% | 71.93% | 1.04 | 0.74 |
| 16935.70 | 90.00% | 15.90% | 36.22% | 74.98% | 1.07 | 0.63 |
| 17488.60 | 90.00% | 18.20% | 36.86% | 77.43% | 1.10 | 0.55 |
| 18392.00 | 90.00% | 20.50% | 37.53% | 79.44% | 1.13 | 0.49 |
| 18956.70 | 90.00% | 22.70% | 38.19% | 81.05% | 1.16 | 0.44 |
| 19162.80 | 85.00% | 22.70% | 36.85% | 74.04% | 1.10 | 0.66 |
| 20323.55 | 85.00% | 25.00% | 37.55% | 75.85% | 1.13 | 0.60 |
| 21455.45 | 85.00% | 27.30% | 38.29% | 77.43% | 1.17 | 0.55 |
| 22284.70 | 85.00% | 29.50% | 39.01% | 78.75% | 1.21 | 0.51 |
| 23178.05 | 85.00% | 31.80% | 39.81% | 79.98% | 1.25 | 0.47 |
| 23988.15 | 85.00% | 34.10% | 40.63% | 81.08% | 1.29 | 0.44 |
| 24896.40 | 85.00% | 36.40% | 41.49% | 82.06% | 1.34 | 0.41 |
| 25271.75 | 85.00% | 38.60% | 42.35% | 82.91% | 1.38 | 0.39 |
| 26821.90 | 85.00% | 40.90% | 43.28% | 83.71% | 1.44 | 0.37 |
| 28283.15 | 85.00% | 43.20% | 44.26% | 84.44% | 1.50 | 0.35 |
| 28574.95 | 85.00% | 45.50% | 45.28% | 85.11% | 1.56 | 0.33 |
| 29045.10 | 85.00% | 47.70% | 46.31% | 85.70% | 1.63 | 0.31 |
| 30750.85 | 80.00% | 47.70% | 44.80% | 81.80% | 1.53 | 0.42 |
| 32867.45 | 80.00% | 50.00% | 45.92% | 82.49% | 1.60 | 0.40 |
| 34025.50 | 80.00% | 52.30% | 47.09% | 83.13% | 1.68 | 0.38 |
| 34508.35 | 80.00% | 54.50% | 48.27% | 83.70% | 1.76 | 0.37 |
| 35045.80 | 80.00% | 56.80% | 49.56% | 84.26% | 1.85 | 0.35 |
| 35737.90 | 80.00% | 59.10% | 50.93% | 84.78% | 1.96 | 0.34 |
| 36351.75 | 80.00% | 61.40% | 52.37% | 85.26% | 2.07 | 0.33 |
| 37324.30 | 80.00% | 63.60% | 53.84% | 85.70% | 2.20 | 0.31 |
| 39361.05 | 80.00% | 65.90% | 55.45% | 86.13% | 2.35 | 0.30 |
| 41256.25 | 80.00% | 68.20% | 57.17% | 86.53% | 2.52 | 0.29 |
| 41666.85 | 80.00% | 70.50% | 59.00% | 86.92% | 2.71 | 0.28 |
| 41732.00 | 75.00% | 70.50% | 57.43% | 84.16% | 2.54 | 0.35 |
| 42474.80 | 70.00% | 70.50% | 55.73% | 81.58% | 2.37 | 0.43 |
| 43224.95 | 70.00% | 72.70% | 57.64% | 82.04% | 2.56 | 0.41 |
| 43335.25 | 65.00% | 72.70% | 55.82% | 79.65% | 2.38 | 0.48 |
| 43489.60 | 60.00% | 72.70% | 53.84% | 77.40% | 2.20 | 0.55 |
| 44409.90 | 60.00% | 75.00% | 56.01% | 77.94% | 2.40 | 0.53 |
| 45625.40 | 55.00% | 75.00% | 53.86% | 75.85% | 2.20 | 0.60 |
| 46076.00 | 55.00% | 77.30% | 56.25% | 76.40% | 2.42 | 0.58 |
| 46144.65 | 55.00% | 79.50% | 58.74% | 76.90% | 2.68 | 0.57 |
| 46284.00 | 50.00% | 79.50% | 56.41% | 74.98% | 2.44 | 0.63 |
| 46567.95 | 45.00% | 79.50% | 53.81% | 73.15% | 2.20 | 0.69 |
| 46949.60 | 45.00% | 81.80% | 56.75% | 73.70% | 2.47 | 0.67 |
| 49476.65 | 45.00% | 84.10% | 60.03% | 74.24% | 2.83 | 0.65 |
| 51790.80 | 40.00% | 84.10% | 57.17% | 72.54% | 2.52 | 0.71 |
| 53757.65 | 35.00% | 84.10% | 53.87% | 70.92% | 2.20 | 0.77 |
| 58046.10 | 30.00% | 84.10% | 50.03% | 69.36% | 1.89 | 0.83 |
| 61066.90 | 30.00% | 86.40% | 53.93% | 69.94% | 2.21 | 0.81 |
| 63085.35 | 30.00% | 88.60% | 58.27% | 70.46% | 2.63 | 0.79 |
| 64876.00 | 25.00% | 88.60% | 53.78% | 69.01% | 2.19 | 0.85 |
| 66274.25 | 25.00% | 90.90% | 59.31% | 69.55% | 2.75 | 0.83 |
| 67853.75 | 25.00% | 93.20% | 66.11% | 70.08% | 3.68 | 0.80 |
| 68875.10 | 25.00% | 95.50% | 74.67% | 70.59% | 5.56 | 0.79 |
| 71979.20 | 20.00% | 95.50% | 70.22% | 69.23% | 4.44 | 0.84 |
| 74929.60 | 15.00% | 95.50% | 63.88% | 67.92% | 3.33 | 0.89 |
| 76625.00 | 10.00% | 95.50% | 54.11% | 66.66% | 2.22 | 0.94 |
| 79796.65 | 5.00% | 95.50% | 37.09% | 65.45% | 1.11 | 0.99 |
| 81837.55 | 0.00% | 95.50% | 0.00% | 64.28% | 0.00 | 1.05 |
| 89072.30 | 0.00% | 97.70% | 0.00% | 64.80% | 0.00 | 1.02 |
| RBP4 | 14299.50 | 100.00% | 2.30% | 35.20% | 100.00% | 1.02 | 0.00 |
| 16167.00 | 95.00% | 2.30% | 34.03% | 46.44% | 0.97 | 2.17 |
| 16919.50 | 95.00% | 4.50% | 34.55% | 62.91% | 0.99 | 1.11 |
| 17670.50 | 95.00% | 6.80% | 35.10% | 71.93% | 1.02 | 0.74 |
| 18159.50 | 90.00% | 6.80% | 33.88% | 56.17% | 0.97 | 1.47 |
| 18294.00 | 90.00% | 9.10% | 34.44% | 63.17% | 0.99 | 1.10 |
| 18341.50 | 90.00% | 11.40% | 35.02% | 68.24% | 1.02 | 0.88 |
| 18525.50 | 90.00% | 13.60% | 35.60% | 71.93% | 1.04 | 0.74 |
| 18696.00 | 90.00% | 15.90% | 36.22% | 74.98% | 1.07 | 0.63 |
| 18724.50 | 90.00% | 18.20% | 36.86% | 77.43% | 1.10 | 0.55 |
| 18991.50 | 90.00% | 20.50% | 37.53% | 79.44% | 1.13 | 0.49 |
| 19350.50 | 85.00% | 20.50% | 36.20% | 72.03% | 1.07 | 0.73 |
| 19471.00 | 85.00% | 22.70% | 36.85% | 74.04% | 1.10 | 0.66 |
| 19593.50 | 85.00% | 25.00% | 37.55% | 75.85% | 1.13 | 0.60 |
| 19839.00 | 85.00% | 27.30% | 38.29% | 77.43% | 1.17 | 0.55 |
| 20000.00 | 85.00% | 29.50% | 39.01% | 78.75% | 1.21 | 0.51 |
| 20028.50 | 85.00% | 31.80% | 39.81% | 79.98% | 1.25 | 0.47 |
| 20114.00 | 85.00% | 34.10% | 40.63% | 81.08% | 1.29 | 0.44 |
| 20290.50 | 85.00% | 36.40% | 41.49% | 82.06% | 1.34 | 0.41 |
| 20402.50 | 85.00% | 38.60% | 42.35% | 82.91% | 1.38 | 0.39 |
| 20424.00 | 85.00% | 40.90% | 43.28% | 83.71% | 1.44 | 0.37 |
| 20435.00 | 85.00% | 43.20% | 44.26% | 84.44% | 1.50 | 0.35 |
| 20750.00 | 80.00% | 45.50% | 43.78% | 81.09% | 1.47 | 0.44 |
| 21183.00 | 80.00% | 47.70% | 44.80% | 81.80% | 1.53 | 0.42 |
| 21387.00 | 80.00% | 50.00% | 45.92% | 82.49% | 1.60 | 0.40 |
| 21529.00 | 75.00% | 50.00% | 44.32% | 79.03% | 1.50 | 0.50 |
| 21680.50 | 75.00% | 52.30% | 45.48% | 79.77% | 1.57 | 0.48 |
| 21822.00 | 70.00% | 52.30% | 43.78% | 76.67% | 1.47 | 0.57 |
| 21888.00 | 70.00% | 54.50% | 44.94% | 77.39% | 1.54 | 0.55 |
| 21916.50 | 70.00% | 56.80% | 46.23% | 78.11% | 1.62 | 0.53 |
| 22087.00 | 70.00% | 59.10% | 47.59% | 78.78% | 1.71 | 0.51 |
| 22432.00 | 70.00% | 61.40% | 49.04% | 79.41% | 1.81 | 0.49 |
| 22772.50 | 65.00% | 61.40% | 47.19% | 76.78% | 1.68 | 0.57 |
| 22966.50 | 60.00% | 61.40% | 45.20% | 74.31% | 1.55 | 0.65 |
| 23113.00 | 60.00% | 63.60% | 46.66% | 74.98% | 1.65 | 0.63 |
| 23238.00 | 55.00% | 63.60% | 44.50% | 72.70% | 1.51 | 0.71 |
| 23271.00 | 55.00% | 65.90% | 46.12% | 73.40% | 1.61 | 0.68 |
| 23357.00 | 55.00% | 68.20% | 47.85% | 74.07% | 1.73 | 0.66 |
| 23490.00 | 50.00% | 68.20% | 45.48% | 71.99% | 1.57 | 0.73 |
| 23592.50 | 50.00% | 70.50% | 47.35% | 72.66% | 1.69 | 0.71 |
| 23649.50 | 50.00% | 72.70% | 49.29% | 73.26% | 1.83 | 0.69 |
| 23858.00 | 50.00% | 75.00% | 51.49% | 73.87% | 2.00 | 0.67 |
| 24095.00 | 45.00% | 75.00% | 48.85% | 71.99% | 1.80 | 0.73 |
| 24156.00 | 45.00% | 77.30% | 51.26% | 72.59% | 1.98 | 0.71 |
| 24204.00 | 45.00% | 79.50% | 53.81% | 73.15% | 2.20 | 0.69 |
| 24385.00 | 40.00% | 79.50% | 50.87% | 71.41% | 1.95 | 0.75 |
| 24585.00 | 40.00% | 81.80% | 53.84% | 71.98% | 2.20 | 0.73 |
| 24810.00 | 40.00% | 84.10% | 57.17% | 72.54% | 2.52 | 0.71 |
| 25143.50 | 35.00% | 84.10% | 53.87% | 70.92% | 2.20 | 0.77 |
| 25335.00 | 30.00% | 84.10% | 50.03% | 69.36% | 1.89 | 0.83 |
| 25392.00 | 25.00% | 84.10% | 45.48% | 67.88% | 1.57 | 0.89 |
| 25452.00 | 25.00% | 86.40% | 49.38% | 68.46% | 1.84 | 0.87 |
| 25723.00 | 25.00% | 88.60% | 53.78% | 69.01% | 2.19 | 0.85 |
| 26098.00 | 25.00% | 90.90% | 59.31% | 69.55% | 2.75 | 0.83 |
| 26451.50 | 20.00% | 90.90% | 53.84% | 68.17% | 2.20 | 0.88 |
| 26807.50 | 20.00% | 93.20% | 60.95% | 68.71% | 2.94 | 0.86 |
| 27995.00 | 15.00% | 93.20% | 53.93% | 67.39% | 2.21 | 0.91 |
| 29212.50 | 15.00% | 95.50% | 63.88% | 67.92% | 3.33 | 0.89 |
| 29674.50 | 15.00% | 97.70% | 77.58% | 68.42% | 6.52 | 0.87 |
| 30360.50 | 10.00% | 97.70% | 69.76% | 67.17% | 4.35 | 0.92 |
| 30758.50 | 5.00% | 97.70% | 53.56% | 65.97% | 2.17 | 0.97 |
| Chemerin | 52588.45 | 100.00% | 2.30% | 35.20% | 100.00% | 1.02 | 0.00 |
| 57064.00 | 95.00% | 2.30% | 34.03% | 46.44% | 0.97 | 2.17 |
| 61305.55 | 95.00% | 4.50% | 34.55% | 62.91% | 0.99 | 1.11 |
| 64602.95 | 95.00% | 6.80% | 35.10% | 71.93% | 1.02 | 0.74 |
| 68474.15 | 95.00% | 9.10% | 35.67% | 77.43% | 1.05 | 0.55 |
| 72418.05 | 95.00% | 11.40% | 36.26% | 81.12% | 1.07 | 0.44 |
| 75008.65 | 95.00% | 13.60% | 36.85% | 83.68% | 1.10 | 0.37 |
| 76337.25 | 95.00% | 15.90% | 37.48% | 85.70% | 1.13 | 0.31 |
| 77483.20 | 95.00% | 18.20% | 38.13% | 87.28% | 1.16 | 0.27 |
| 78388.00 | 90.00% | 18.20% | 36.86% | 77.43% | 1.10 | 0.55 |
| 79475.05 | 90.00% | 20.50% | 37.53% | 79.44% | 1.13 | 0.49 |
| 81193.10 | 85.00% | 20.50% | 36.20% | 72.03% | 1.07 | 0.73 |
| 82379.85 | 85.00% | 22.70% | 36.85% | 74.04% | 1.10 | 0.66 |
| 82617.55 | 85.00% | 25.00% | 37.55% | 75.85% | 1.13 | 0.60 |
| 83663.75 | 85.00% | 27.30% | 38.29% | 77.43% | 1.17 | 0.55 |
| 84554.40 | 85.00% | 29.50% | 39.01% | 78.75% | 1.21 | 0.51 |
| 84809.75 | 85.00% | 31.80% | 39.81% | 79.98% | 1.25 | 0.47 |
| 85593.95 | 85.00% | 34.10% | 40.63% | 81.08% | 1.29 | 0.44 |
| 86584.20 | 80.00% | 34.10% | 39.18% | 76.27% | 1.21 | 0.59 |
| 87413.25 | 80.00% | 36.40% | 40.03% | 77.43% | 1.26 | 0.55 |
| 87990.05 | 80.00% | 38.60% | 40.88% | 78.44% | 1.30 | 0.52 |
| 89108.60 | 80.00% | 40.90% | 41.80% | 79.40% | 1.35 | 0.49 |
| 90627.80 | 80.00% | 43.20% | 42.77% | 80.28% | 1.41 | 0.46 |
| 91482.55 | 80.00% | 45.50% | 43.78% | 81.09% | 1.47 | 0.44 |
| 91927.85 | 80.00% | 47.70% | 44.80% | 81.80% | 1.53 | 0.42 |
| 93014.65 | 80.00% | 50.00% | 45.92% | 82.49% | 1.60 | 0.40 |
| 94064.45 | 80.00% | 52.30% | 47.09% | 83.13% | 1.68 | 0.38 |
| 94524.45 | 80.00% | 54.50% | 48.27% | 83.70% | 1.76 | 0.37 |
| 94966.40 | 80.00% | 56.80% | 49.56% | 84.26% | 1.85 | 0.35 |
| 95522.80 | 80.00% | 59.10% | 50.93% | 84.78% | 1.96 | 0.34 |
| 96486.45 | 75.00% | 59.10% | 49.32% | 81.67% | 1.83 | 0.42 |
| 97052.60 | 75.00% | 61.40% | 50.76% | 82.23% | 1.94 | 0.41 |
| 97274.20 | 75.00% | 63.60% | 52.23% | 82.74% | 2.06 | 0.39 |
| 98056.10 | 75.00% | 65.90% | 53.85% | 83.24% | 2.20 | 0.38 |
| 98768.00 | 70.00% | 65.90% | 52.14% | 80.54% | 2.05 | 0.46 |
| 100018.80 | 65.00% | 65.90% | 50.28% | 78.01% | 1.91 | 0.53 |
| 101870.00 | 65.00% | 68.20% | 52.03% | 78.60% | 2.04 | 0.51 |
| 102686.00 | 60.00% | 68.20% | 50.03% | 76.27% | 1.89 | 0.59 |
| 102865.00 | 55.00% | 68.20% | 47.85% | 74.07% | 1.73 | 0.66 |
| 103290.00 | 55.00% | 70.50% | 49.73% | 74.70% | 1.86 | 0.64 |
| 104068.00 | 55.00% | 72.70% | 51.67% | 75.28% | 2.01 | 0.62 |
| 104747.00 | 50.00% | 72.70% | 49.29% | 73.26% | 1.83 | 0.69 |
| 106098.50 | 50.00% | 75.00% | 51.49% | 73.87% | 2.00 | 0.67 |
| 107342.50 | 50.00% | 77.30% | 53.89% | 74.45% | 2.20 | 0.65 |
| 108804.50 | 45.00% | 77.30% | 51.26% | 72.59% | 1.98 | 0.71 |
| 110438.50 | 45.00% | 79.50% | 53.81% | 73.15% | 2.20 | 0.69 |
| 111104.50 | 45.00% | 81.80% | 56.75% | 73.70% | 2.47 | 0.67 |
| 111736.00 | 40.00% | 81.80% | 53.84% | 71.98% | 2.20 | 0.73 |
| 112480.00 | 40.00% | 84.10% | 57.17% | 72.54% | 2.52 | 0.71 |
| 113904.00 | 35.00% | 84.10% | 53.87% | 70.92% | 2.20 | 0.77 |
| 114961.50 | 30.00% | 84.10% | 50.03% | 69.36% | 1.89 | 0.83 |
| 117614.00 | 30.00% | 86.40% | 53.93% | 69.94% | 2.21 | 0.81 |
| 121768.50 | 25.00% | 86.40% | 49.38% | 68.46% | 1.84 | 0.87 |
| 125171.00 | 20.00% | 86.40% | 43.83% | 67.06% | 1.47 | 0.93 |
| 128033.00 | 20.00% | 88.60% | 48.21% | 67.61% | 1.75 | 0.90 |
| 129179.50 | 15.00% | 88.60% | 41.11% | 66.27% | 1.32 | 0.96 |
| 130207.50 | 15.00% | 90.90% | 46.66% | 66.84% | 1.65 | 0.94 |
| 133700.00 | 10.00% | 90.90% | 36.83% | 65.56% | 1.10 | 0.99 |
| 139974.50 | 5.00% | 90.90% | 22.57% | 64.33% | 0.55 | 1.05 |
| 144443.00 | 0.00% | 90.90% | 0.00% | 63.14% | 0.00 | 1.10 |
| 145644.50 | 0.00% | 93.20% | 0.00% | 63.72% | 0.00 | 1.07 |
| 147677.00 | 0.00% | 95.50% | 0.00% | 64.28% | 0.00 | 1.05 |
| 153547.00 | 0.00% | 97.70% | 0.00% | 64.80% | 0.00 | 1.02 |
| HOMA | 1.01 | 100.00% | 2.30% | 35.20% | 100.00% | 1.02 | 0.00 |
| 1.20 | 100.00% | 4.50% | 35.72% | 100.00% | 1.05 | 0.00 |
| 1.21 | 100.00% | 6.80% | 36.28% | 100.00% | 1.07 | 0.00 |
| 1.24 | 100.00% | 9.10% | 36.86% | 100.00% | 1.10 | 0.00 |
| 1.28 | 100.00% | 11.40% | 37.46% | 100.00% | 1.13 | 0.00 |
| 1.33 | 100.00% | 13.60% | 38.05% | 100.00% | 1.16 | 0.00 |
| 1.41 | 100.00% | 15.90% | 38.69% | 100.00% | 1.19 | 0.00 |
| 1.46 | 95.00% | 18.20% | 38.13% | 87.28% | 1.16 | 0.27 |
| 1.48 | 95.00% | 20.50% | 38.80% | 88.54% | 1.19 | 0.24 |
| 1.54 | 95.00% | 22.70% | 39.47% | 89.54% | 1.23 | 0.22 |
| 1.60 | 90.00% | 22.70% | 38.19% | 81.05% | 1.16 | 0.44 |
| 1.65 | 90.00% | 25.00% | 38.90% | 82.49% | 1.20 | 0.40 |
| 1.71 | 90.00% | 27.30% | 39.65% | 83.73% | 1.24 | 0.37 |
| 1.75 | 90.00% | 29.50% | 40.38% | 84.76% | 1.28 | 0.34 |
| 1.82 | 90.00% | 31.80% | 41.18% | 85.70% | 1.32 | 0.31 |
| 1.91 | 90.00% | 34.10% | 42.02% | 86.53% | 1.37 | 0.29 |
| 1.95 | 90.00% | 36.40% | 42.89% | 87.28% | 1.42 | 0.27 |
| 1.96 | 85.00% | 36.40% | 41.49% | 82.06% | 1.34 | 0.41 |
| 1.98 | 85.00% | 38.60% | 42.35% | 82.91% | 1.38 | 0.39 |
| 2.02 | 85.00% | 40.90% | 43.28% | 83.71% | 1.44 | 0.37 |
| 2.05 | 85.00% | 43.20% | 44.26% | 84.44% | 1.50 | 0.35 |
| 2.07 | 85.00% | 45.50% | 45.28% | 85.11% | 1.56 | 0.33 |
| 2.12 | 85.00% | 47.70% | 46.31% | 85.70% | 1.63 | 0.31 |
| 2.20 | 85.00% | 50.00% | 47.42% | 86.27% | 1.70 | 0.30 |
| 2.26 | 85.00% | 52.30% | 48.60% | 86.79% | 1.78 | 0.29 |
| 2.28 | 85.00% | 54.50% | 49.78% | 87.26% | 1.87 | 0.28 |
| 2.31 | 85.00% | 56.80% | 51.08% | 87.71% | 1.97 | 0.26 |
| 2.34 | 85.00% | 59.10% | 52.44% | 88.13% | 2.08 | 0.25 |
| 2.39 | 85.00% | 61.40% | 53.88% | 88.52% | 2.20 | 0.24 |
| 2.43 | 80.00% | 61.40% | 52.37% | 85.26% | 2.07 | 0.33 |
| 2.48 | 80.00% | 63.60% | 53.84% | 85.70% | 2.20 | 0.31 |
| 2.53 | 80.00% | 65.90% | 55.45% | 86.13% | 2.35 | 0.30 |
| 2.59 | 80.00% | 68.20% | 57.17% | 86.53% | 2.52 | 0.29 |
| 2.63 | 80.00% | 70.50% | 59.00% | 86.92% | 2.71 | 0.28 |
| 2.69 | 80.00% | 72.70% | 60.86% | 87.26% | 2.93 | 0.28 |
| 2.74 | 80.00% | 75.00% | 62.93% | 87.60% | 3.20 | 0.27 |
| 2.77 | 75.00% | 75.00% | 61.42% | 84.97% | 3.00 | 0.33 |
| 2.79 | 70.00% | 75.00% | 59.77% | 82.49% | 2.80 | 0.40 |
| 2.81 | 65.00% | 75.00% | 57.98% | 80.15% | 2.60 | 0.47 |
| 2.83 | 65.00% | 77.30% | 60.31% | 80.63% | 2.86 | 0.45 |
| 2.85 | 60.00% | 77.30% | 58.38% | 78.46% | 2.64 | 0.52 |
| 2.92 | 60.00% | 79.50% | 60.83% | 78.93% | 2.93 | 0.50 |
| 2.98 | 55.00% | 79.50% | 58.74% | 76.90% | 2.68 | 0.57 |
| 3.00 | 55.00% | 81.80% | 61.59% | 77.41% | 3.02 | 0.55 |
| 3.01 | 55.00% | 84.10% | 64.73% | 77.89% | 3.46 | 0.54 |
| 3.07 | 55.00% | 86.40% | 68.21% | 78.35% | 4.04 | 0.52 |
| 3.16 | 55.00% | 88.60% | 71.91% | 78.77% | 4.82 | 0.51 |
| 3.22 | 50.00% | 88.60% | 69.95% | 76.96% | 4.39 | 0.56 |
| 3.24 | 45.00% | 88.60% | 67.68% | 75.22% | 3.95 | 0.62 |
| 3.38 | 40.00% | 88.60% | 65.06% | 73.57% | 3.51 | 0.68 |
| 3.53 | 40.00% | 90.90% | 69.99% | 74.06% | 4.40 | 0.66 |
| 3.63 | 40.00% | 93.20% | 75.74% | 74.54% | 5.88 | 0.64 |
| 3.76 | 40.00% | 95.50% | 82.51% | 75.00% | 8.89 | 0.63 |
| 3.85 | 35.00% | 95.50% | 80.50% | 73.47% | 7.78 | 0.68 |
| 3.93 | 30.00% | 95.50% | 77.96% | 72.00% | 6.67 | 0.73 |
| 4.02 | 25.00% | 95.50% | 74.67% | 70.59% | 5.56 | 0.79 |
| 4.29 | 20.00% | 95.50% | 70.22% | 69.23% | 4.44 | 0.84 |
| 5.10 | 20.00% | 97.70% | 82.19% | 69.71% | 8.70 | 0.82 |
| 5.70 | 15.00% | 97.70% | 77.58% | 68.42% | 6.52 | 0.87 |
| 5.82 | 10.00% | 97.70% | 69.76% | 67.17% | 4.35 | 0.92 |
| Resistin | 5.75 | 97.90% | 3.80% | 35.06% | 77.33% | 1.02 | 0.55 |
| 5.97 | 95.70% | 3.80% | 34.55% | 62.48% | 0.99 | 1.13 |
| 6.46 | 93.60% | 3.80% | 34.05% | 52.81% | 0.97 | 1.68 |
| 7.02 | 93.60% | 7.70% | 34.98% | 69.39% | 1.01 | 0.83 |
| 7.13 | 91.50% | 7.70% | 34.47% | 63.06% | 0.99 | 1.10 |
| 7.23 | 91.50% | 11.50% | 35.43% | 71.83% | 1.03 | 0.74 |
| 7.45 | 91.50% | 15.40% | 36.46% | 77.35% | 1.08 | 0.55 |
| 7.65 | 91.50% | 19.20% | 37.53% | 80.98% | 1.13 | 0.44 |
| 7.79 | 91.50% | 23.10% | 38.70% | 83.66% | 1.19 | 0.37 |
| 7.89 | 89.40% | 23.10% | 38.15% | 80.42% | 1.16 | 0.46 |
| 7.93 | 89.40% | 30.80% | 40.67% | 84.56% | 1.29 | 0.34 |
| 7.96 | 89.40% | 34.60% | 42.04% | 86.02% | 1.37 | 0.31 |
| 8.01 | 89.40% | 38.50% | 43.55% | 87.25% | 1.45 | 0.28 |
| 8.08 | 89.40% | 42.30% | 45.12% | 88.26% | 1.55 | 0.25 |
| 8.35 | 89.40% | 46.20% | 46.86% | 89.15% | 1.66 | 0.23 |
| 8.72 | 89.40% | 50.00% | 48.68% | 89.89% | 1.79 | 0.21 |
| 8.87 | 89.40% | 53.80% | 50.66% | 90.54% | 1.94 | 0.20 |
| 8.91 | 89.40% | 57.70% | 52.86% | 91.12% | 2.11 | 0.18 |
| 8.94 | 87.20% | 57.70% | 52.24% | 89.47% | 2.06 | 0.22 |
| 8.98 | 85.10% | 57.70% | 51.63% | 87.95% | 2.01 | 0.26 |
| 9.06 | 83.00% | 57.70% | 51.01% | 86.48% | 1.96 | 0.29 |
| 9.20 | 80.90% | 57.70% | 50.37% | 85.06% | 1.91 | 0.33 |
| 9.52 | 78.70% | 57.70% | 49.68% | 83.62% | 1.86 | 0.37 |
| 9.90 | 78.70% | 61.50% | 52.03% | 84.48% | 2.04 | 0.35 |
| 10.06 | 78.70% | 65.40% | 54.69% | 85.27% | 2.27 | 0.33 |
| 10.16 | 74.50% | 65.40% | 53.33% | 82.86% | 2.15 | 0.39 |
| 10.25 | 72.30% | 65.40% | 52.58% | 81.65% | 2.09 | 0.42 |
| 10.36 | 70.20% | 65.40% | 51.84% | 80.53% | 2.03 | 0.46 |
| 10.56 | 68.10% | 65.40% | 51.08% | 79.44% | 1.97 | 0.49 |
| 10.75 | 66.00% | 65.40% | 50.30% | 78.38% | 1.91 | 0.52 |
| 10.87 | 63.80% | 65.40% | 49.45% | 77.30% | 1.84 | 0.55 |
| 10.89 | 61.70% | 65.40% | 48.62% | 76.29% | 1.78 | 0.59 |
| 11.10 | 59.60% | 65.40% | 47.75% | 75.31% | 1.72 | 0.62 |
| 11.39 | 57.40% | 65.40% | 46.82% | 74.31% | 1.66 | 0.65 |
| 11.49 | 55.30% | 65.40% | 45.89% | 73.39% | 1.60 | 0.68 |
| 11.61 | 53.20% | 65.40% | 44.93% | 72.48% | 1.54 | 0.72 |
| 11.78 | 53.20% | 69.20% | 47.82% | 73.59% | 1.73 | 0.68 |
| 11.86 | 51.10% | 69.20% | 46.82% | 72.73% | 1.66 | 0.71 |
| 11.93 | 48.90% | 69.20% | 45.72% | 71.85% | 1.59 | 0.74 |
| 12.02 | 48.90% | 73.10% | 49.10% | 72.94% | 1.82 | 0.70 |
| 12.09 | 46.80% | 73.10% | 48.00% | 72.14% | 1.74 | 0.73 |
| 12.17 | 44.70% | 73.10% | 46.86% | 71.36% | 1.66 | 0.76 |
| 12.28 | 42.60% | 73.10% | 45.66% | 70.59% | 1.58 | 0.79 |
| 12.39 | 40.40% | 73.10% | 44.35% | 69.80% | 1.50 | 0.82 |
| 12.47 | 38.30% | 73.10% | 43.04% | 69.07% | 1.42 | 0.84 |
| 12.69 | 38.30% | 76.90% | 46.80% | 70.14% | 1.66 | 0.80 |
| 12.96 | 34.00% | 76.90% | 43.85% | 68.71% | 1.47 | 0.86 |
| 13.03 | 31.90% | 76.90% | 42.29% | 68.03% | 1.38 | 0.89 |
| 13.31 | 29.80% | 76.90% | 40.64% | 67.37% | 1.29 | 0.91 |
| 13.64 | 29.80% | 80.80% | 45.16% | 68.45% | 1.55 | 0.87 |
| 13.85 | 29.80% | 84.60% | 50.66% | 69.43% | 1.94 | 0.83 |
| 14.10 | 27.70% | 84.60% | 48.83% | 68.80% | 1.80 | 0.85 |
| 14.22 | 25.50% | 84.60% | 46.77% | 68.15% | 1.66 | 0.88 |
| 14.40 | 23.40% | 84.60% | 44.64% | 67.55% | 1.52 | 0.91 |
| 14.72 | 21.30% | 84.60% | 42.33% | 66.95% | 1.38 | 0.93 |
| 14.99 | 21.30% | 88.50% | 49.57% | 67.94% | 1.85 | 0.89 |
| 15.11 | 19.10% | 88.50% | 46.84% | 67.34% | 1.66 | 0.91 |
| 15.36 | 19.10% | 92.30% | 56.83% | 68.26% | 2.48 | 0.88 |
| 15.63 | 17.00% | 92.30% | 53.95% | 67.70% | 2.21 | 0.90 |
| 15.86 | 14.90% | 92.30% | 50.66% | 67.15% | 1.94 | 0.92 |
| 16.14 | 12.80% | 92.30% | 46.87% | 66.61% | 1.66 | 0.94 |
| 16.25 | 12.80% | 96.20% | 64.12% | 67.52% | 3.37 | 0.91 |
| Adiponectin | 1925.95 | 100.00% | 3.80% | 35.55% | 100.00% | 1.04 | 0.00 |
| 1946.60 | 97.90% | 3.80% | 35.06% | 77.33% | 1.02 | 0.55 |
| 1974.50 | 97.90% | 7.70% | 36.01% | 87.36% | 1.06 | 0.27 |
| 1997.30 | 97.90% | 11.50% | 36.99% | 91.17% | 1.11 | 0.18 |
| 2025.35 | 97.90% | 15.40% | 38.04% | 93.25% | 1.16 | 0.14 |
| 2224.05 | 97.90% | 19.20% | 39.13% | 94.51% | 1.21 | 0.11 |
| 2440.00 | 95.70% | 19.20% | 38.59% | 89.38% | 1.18 | 0.22 |
| 2543.25 | 93.60% | 19.20% | 38.07% | 84.97% | 1.16 | 0.33 |
| 2646.10 | 93.60% | 23.10% | 39.24% | 87.18% | 1.22 | 0.28 |
| 2755.95 | 93.60% | 26.90% | 40.46% | 88.79% | 1.28 | 0.24 |
| 2864.00 | 91.50% | 26.90% | 39.91% | 85.64% | 1.25 | 0.32 |
| 2905.00 | 89.40% | 26.90% | 39.35% | 82.71% | 1.22 | 0.39 |
| 2910.40 | 89.40% | 30.80% | 40.67% | 84.56% | 1.29 | 0.34 |
| 2990.35 | 89.40% | 34.60% | 42.04% | 86.02% | 1.37 | 0.31 |
| 3086.15 | 87.20% | 34.60% | 41.43% | 83.59% | 1.33 | 0.37 |
| 3129.30 | 85.10% | 34.60% | 40.84% | 81.40% | 1.30 | 0.43 |
| 3175.25 | 83.00% | 34.60% | 40.24% | 79.32% | 1.27 | 0.49 |
| 3287.35 | 83.00% | 38.50% | 41.73% | 81.02% | 1.35 | 0.44 |
| 3413.15 | 80.90% | 38.50% | 41.11% | 79.16% | 1.32 | 0.50 |
| 3506.70 | 80.90% | 42.30% | 42.66% | 80.67% | 1.40 | 0.45 |
| 3623.50 | 80.90% | 46.20% | 44.38% | 82.01% | 1.50 | 0.41 |
| 3698.10 | 80.90% | 50.00% | 46.19% | 83.15% | 1.62 | 0.38 |
| 3816.90 | 78.70% | 50.00% | 45.51% | 81.56% | 1.57 | 0.43 |
| 3981.30 | 78.70% | 53.80% | 47.48% | 82.64% | 1.70 | 0.40 |
| 4090.45 | 76.60% | 53.80% | 46.80% | 81.25% | 1.66 | 0.43 |
| 4163.25 | 74.50% | 53.80% | 46.11% | 79.90% | 1.61 | 0.47 |
| 4211.85 | 72.30% | 53.80% | 45.37% | 78.54% | 1.56 | 0.51 |
| 4259.70 | 72.30% | 57.70% | 47.56% | 79.70% | 1.71 | 0.48 |
| 4293.40 | 72.30% | 61.50% | 49.91% | 80.71% | 1.88 | 0.45 |
| 4321.05 | 70.20% | 61.50% | 49.17% | 79.55% | 1.82 | 0.48 |
| 4350.40 | 68.10% | 61.50% | 48.42% | 78.42% | 1.77 | 0.52 |
| 4410.35 | 66.00% | 61.50% | 47.63% | 77.32% | 1.71 | 0.55 |
| 4687.30 | 63.80% | 61.50% | 46.79% | 76.20% | 1.66 | 0.59 |
| 5151.40 | 63.80% | 65.40% | 49.45% | 77.30% | 1.84 | 0.55 |
| 5483.40 | 61.70% | 65.40% | 48.62% | 76.29% | 1.78 | 0.59 |
| 5595.55 | 59.60% | 65.40% | 47.75% | 75.31% | 1.72 | 0.62 |
| 5712.05 | 57.40% | 65.40% | 46.82% | 74.31% | 1.66 | 0.65 |
| 5820.30 | 55.30% | 65.40% | 45.89% | 73.39% | 1.60 | 0.68 |
| 5869.50 | 53.20% | 65.40% | 44.93% | 72.48% | 1.54 | 0.72 |
| 5928.20 | 51.10% | 65.40% | 43.94% | 71.60% | 1.48 | 0.75 |
| 6032.40 | 48.90% | 65.40% | 42.85% | 70.69% | 1.41 | 0.78 |
| 6129.90 | 46.80% | 65.40% | 41.78% | 69.85% | 1.35 | 0.81 |
| 6163.20 | 44.70% | 65.40% | 40.67% | 69.03% | 1.29 | 0.85 |
| 6190.65 | 42.60% | 65.40% | 39.51% | 68.23% | 1.23 | 0.88 |
| 6228.70 | 42.60% | 69.20% | 42.33% | 69.44% | 1.38 | 0.83 |
| 6328.75 | 40.40% | 69.20% | 41.04% | 68.63% | 1.31 | 0.86 |
| 6413.80 | 40.40% | 73.10% | 44.35% | 69.80% | 1.50 | 0.82 |
| 6562.90 | 38.30% | 73.10% | 43.04% | 69.07% | 1.42 | 0.84 |
| 6696.95 | 36.20% | 73.10% | 41.66% | 68.35% | 1.35 | 0.87 |
| 6701.00 | 34.00% | 73.10% | 40.14% | 67.61% | 1.26 | 0.90 |
| 6753.90 | 31.90% | 73.10% | 38.62% | 66.92% | 1.19 | 0.93 |
| 6870.35 | 31.90% | 76.90% | 42.29% | 68.03% | 1.38 | 0.89 |
| 6958.75 | 29.80% | 76.90% | 40.64% | 67.37% | 1.29 | 0.91 |
| 6985.25 | 27.70% | 76.90% | 38.89% | 66.72% | 1.20 | 0.94 |
| 7195.80 | 27.70% | 80.80% | 43.36% | 67.81% | 1.44 | 0.89 |
| 7458.65 | 25.50% | 80.80% | 41.34% | 67.15% | 1.33 | 0.92 |
| 7518.10 | 25.50% | 84.60% | 46.77% | 68.15% | 1.66 | 0.88 |
| 7606.95 | 23.40% | 84.60% | 44.64% | 67.55% | 1.52 | 0.91 |
| 7811.40 | 23.40% | 88.50% | 51.92% | 68.53% | 2.03 | 0.87 |
| 8056.70 | 21.30% | 88.50% | 49.57% | 67.94% | 1.85 | 0.89 |
| 8209.15 | 19.10% | 88.50% | 46.84% | 67.34% | 1.66 | 0.91 |
| 8365.45 | 17.00% | 88.50% | 43.96% | 66.77% | 1.48 | 0.94 |
| 8515.35 | 14.90% | 88.50% | 40.74% | 66.22% | 1.30 | 0.96 |
| 8854.95 | 14.90% | 92.30% | 50.66% | 67.15% | 1.94 | 0.92 |
| 9390.80 | 12.80% | 92.30% | 46.87% | 66.61% | 1.66 | 0.94 |
| 9982.25 | 10.60% | 92.30% | 42.21% | 66.05% | 1.38 | 0.97 |
| 10449.65 | 8.50% | 92.30% | 36.94% | 65.53% | 1.10 | 0.99 |
| 10586.35 | 6.40% | 92.30% | 30.61% | 65.02% | 0.83 | 1.01 |
| 10639.40 | 4.30% | 92.30% | 22.86% | 64.51% | 0.56 | 1.04 |
| 11277.55 | 4.30% | 96.20% | 37.52% | 65.45% | 1.13 | 0.99 |
| 12105.50 | 2.10% | 96.20% | 22.67% | 64.94% | 0.55 | 1.02 |
| Osteocalcin | 5.29 | 93.60% | 3.80% | 34.05% | 52.81% | 0.97 | 1.68 |
| 5.50 | 93.60% | 7.70% | 34.98% | 69.39% | 1.01 | 0.83 |
| 5.70 | 91.50% | 7.70% | 34.47% | 63.06% | 0.99 | 1.10 |
| 6.10 | 91.50% | 11.50% | 35.43% | 71.83% | 1.03 | 0.74 |
| 6.55 | 89.40% | 11.50% | 34.90% | 67.16% | 1.01 | 0.92 |
| 6.99 | 87.20% | 11.50% | 34.33% | 62.87% | 0.99 | 1.11 |
| 7.30 | 85.10% | 11.50% | 33.78% | 59.26% | 0.96 | 1.30 |
| 7.35 | 83.00% | 11.50% | 33.23% | 56.04% | 0.94 | 1.48 |
| 7.81 | 83.00% | 15.40% | 34.24% | 63.06% | 0.98 | 1.10 |
| 8.56 | 80.90% | 15.40% | 33.66% | 60.31% | 0.96 | 1.24 |
| 9.15 | 80.90% | 19.20% | 34.69% | 65.45% | 1.00 | 0.99 |
| 9.46 | 80.90% | 23.10% | 35.82% | 69.51% | 1.05 | 0.83 |
| 9.72 | 78.70% | 23.10% | 35.19% | 67.15% | 1.02 | 0.92 |
| 10.11 | 76.60% | 23.10% | 34.58% | 65.04% | 1.00 | 1.01 |
| 10.31 | 74.50% | 23.10% | 33.95% | 63.06% | 0.97 | 1.10 |
| 10.35 | 72.30% | 23.10% | 33.28% | 61.11% | 0.94 | 1.20 |
| 10.45 | 72.30% | 26.90% | 34.42% | 64.67% | 0.99 | 1.03 |
| 10.55 | 70.20% | 26.90% | 33.76% | 62.98% | 0.96 | 1.11 |
| 10.57 | 70.20% | 30.80% | 34.99% | 66.08% | 1.01 | 0.97 |
| 10.69 | 68.10% | 30.80% | 34.30% | 64.53% | 0.98 | 1.04 |
| 10.97 | 66.00% | 30.80% | 33.60% | 63.06% | 0.95 | 1.10 |
| 11.15 | 63.80% | 30.80% | 32.85% | 61.59% | 0.92 | 1.18 |
| 11.37 | 61.70% | 30.80% | 32.12% | 60.25% | 0.89 | 1.24 |
| 11.83 | 59.60% | 30.80% | 31.37% | 58.96% | 0.86 | 1.31 |
| 12.14 | 59.60% | 34.60% | 32.59% | 61.75% | 0.91 | 1.17 |
| 12.46 | 59.60% | 38.50% | 33.96% | 64.23% | 0.97 | 1.05 |
| 12.85 | 57.40% | 38.50% | 33.12% | 63.01% | 0.93 | 1.11 |
| 13.10 | 55.30% | 38.50% | 32.30% | 61.88% | 0.90 | 1.16 |
| 13.44 | 53.20% | 38.50% | 31.46% | 60.79% | 0.87 | 1.22 |
| 13.69 | 51.10% | 38.50% | 30.60% | 59.74% | 0.83 | 1.27 |
| 13.77 | 48.90% | 38.50% | 29.67% | 58.68% | 0.80 | 1.33 |
| 13.92 | 46.80% | 38.50% | 28.76% | 57.70% | 0.76 | 1.38 |
| 14.07 | 44.70% | 38.50% | 27.83% | 56.75% | 0.73 | 1.44 |
| 14.16 | 44.70% | 42.30% | 29.13% | 59.04% | 0.77 | 1.31 |
| 14.40 | 42.60% | 42.30% | 28.15% | 58.14% | 0.74 | 1.36 |
| 14.63 | 40.40% | 42.30% | 27.09% | 57.22% | 0.70 | 1.41 |
| 14.77 | 40.40% | 46.20% | 28.49% | 59.36% | 0.75 | 1.29 |
| 15.21 | 40.40% | 50.00% | 30.01% | 61.26% | 0.81 | 1.19 |
| 15.59 | 40.40% | 53.80% | 31.69% | 62.98% | 0.87 | 1.11 |
| 15.83 | 38.30% | 53.80% | 30.55% | 62.17% | 0.83 | 1.15 |
| 16.20 | 36.20% | 53.80% | 29.37% | 61.38% | 0.78 | 1.19 |
| 16.41 | 34.00% | 53.80% | 28.08% | 60.57% | 0.74 | 1.23 |
| 16.59 | 31.90% | 53.80% | 26.81% | 59.82% | 0.69 | 1.27 |
| 17.02 | 31.90% | 57.70% | 28.58% | 61.49% | 0.75 | 1.18 |
| 17.46 | 31.90% | 61.50% | 30.54% | 62.99% | 0.83 | 1.11 |
| 17.78 | 29.80% | 61.50% | 29.11% | 62.28% | 0.77 | 1.14 |
| 18.09 | 29.80% | 65.40% | 31.37% | 63.71% | 0.86 | 1.07 |
| 19.44 | 27.70% | 65.40% | 29.81% | 63.03% | 0.80 | 1.11 |
| 20.70 | 27.70% | 69.20% | 32.30% | 64.33% | 0.90 | 1.04 |
| 21.86 | 25.50% | 69.20% | 30.52% | 63.64% | 0.83 | 1.08 |
| 23.92 | 25.50% | 73.10% | 33.47% | 64.90% | 0.95 | 1.02 |
| 24.88 | 25.50% | 76.90% | 36.94% | 66.05% | 1.10 | 0.97 |
| 25.53 | 23.40% | 76.90% | 34.96% | 65.42% | 1.01 | 1.00 |
| 26.28 | 23.40% | 80.80% | 39.27% | 66.53% | 1.22 | 0.95 |
| 27.68 | 23.40% | 84.60% | 44.64% | 67.55% | 1.52 | 0.91 |
| 29.08 | 23.40% | 88.50% | 51.92% | 68.53% | 2.03 | 0.87 |
| 29.24 | 23.40% | 92.30% | 61.72% | 69.43% | 3.04 | 0.83 |
| 29.72 | 23.40% | 96.20% | 76.57% | 70.30% | 6.16 | 0.80 |
| 30.34 | 21.30% | 96.20% | 74.84% | 69.73% | 5.61 | 0.82 |
| QUICKI | 0.28 | 100.00% | 3.80% | 35.55% | 100.00% | 1.04 | 0.00 |
| 0.29 | 100.00% | 7.70% | 36.50% | 100.00% | 1.08 | 0.00 |
| 0.29 | 97.90% | 7.70% | 36.01% | 87.36% | 1.06 | 0.27 |
| 0.30 | 95.70% | 7.70% | 35.49% | 77.14% | 1.04 | 0.56 |
| 0.30 | 95.70% | 11.50% | 36.46% | 83.44% | 1.08 | 0.37 |
| 0.30 | 95.70% | 15.40% | 37.51% | 87.10% | 1.13 | 0.28 |
| 0.31 | 93.60% | 15.40% | 36.99% | 81.93% | 1.11 | 0.42 |
| 0.31 | 93.60% | 19.20% | 38.07% | 84.97% | 1.16 | 0.33 |
| 0.31 | 93.60% | 23.10% | 39.24% | 87.18% | 1.22 | 0.28 |
| 0.31 | 93.60% | 26.90% | 40.46% | 88.79% | 1.28 | 0.24 |
| 0.31 | 93.60% | 30.80% | 41.78% | 90.07% | 1.35 | 0.21 |
| 0.31 | 93.60% | 34.60% | 43.16% | 91.06% | 1.43 | 0.18 |
| 0.31 | 93.60% | 38.50% | 44.68% | 91.89% | 1.52 | 0.17 |
| 0.32 | 91.50% | 38.50% | 44.12% | 89.51% | 1.49 | 0.22 |
| 0.32 | 89.40% | 38.50% | 43.55% | 87.25% | 1.45 | 0.28 |
| 0.32 | 87.20% | 38.50% | 42.93% | 85.00% | 1.42 | 0.33 |
| 0.32 | 85.10% | 38.50% | 42.34% | 82.96% | 1.38 | 0.39 |
| 0.32 | 85.10% | 42.30% | 43.90% | 84.25% | 1.47 | 0.35 |
| 0.32 | 85.10% | 46.20% | 45.63% | 85.39% | 1.58 | 0.32 |
| 0.32 | 85.10% | 50.00% | 47.45% | 86.35% | 1.70 | 0.30 |
| 0.32 | 85.10% | 53.80% | 49.43% | 87.19% | 1.84 | 0.28 |
| 0.32 | 83.00% | 53.80% | 48.80% | 85.64% | 1.80 | 0.32 |
| 0.32 | 83.00% | 57.70% | 51.01% | 86.48% | 1.96 | 0.29 |
| 0.32 | 80.90% | 57.70% | 50.37% | 85.06% | 1.91 | 0.33 |
| 0.32 | 78.70% | 57.70% | 49.68% | 83.62% | 1.86 | 0.37 |
| 0.32 | 76.60% | 57.70% | 49.00% | 82.29% | 1.81 | 0.41 |
| 0.33 | 76.60% | 61.50% | 51.36% | 83.20% | 1.99 | 0.38 |
| 0.33 | 74.50% | 61.50% | 50.66% | 81.97% | 1.94 | 0.41 |
| 0.33 | 74.50% | 65.40% | 53.33% | 82.86% | 2.15 | 0.39 |
| 0.33 | 72.30% | 65.40% | 52.58% | 81.65% | 2.09 | 0.42 |
| 0.33 | 72.30% | 69.20% | 55.47% | 82.48% | 2.35 | 0.40 |
| 0.33 | 72.30% | 73.10% | 58.78% | 83.26% | 2.69 | 0.38 |
| 0.33 | 72.30% | 76.90% | 62.42% | 83.95% | 3.13 | 0.36 |
| 0.33 | 70.20% | 76.90% | 61.72% | 82.94% | 3.04 | 0.39 |
| 0.33 | 68.10% | 76.90% | 61.00% | 81.96% | 2.95 | 0.41 |
| 0.33 | 66.00% | 76.90% | 60.25% | 81.00% | 2.86 | 0.44 |
| 0.33 | 63.80% | 76.90% | 59.44% | 80.01% | 2.76 | 0.47 |
| 0.33 | 61.70% | 76.90% | 58.63% | 79.10% | 2.67 | 0.50 |
| 0.33 | 59.60% | 76.90% | 57.79% | 78.20% | 2.58 | 0.53 |
| 0.33 | 59.60% | 80.80% | 62.22% | 79.03% | 3.10 | 0.50 |
| 0.34 | 59.60% | 84.60% | 67.25% | 79.78% | 3.87 | 0.48 |
| 0.34 | 57.40% | 84.60% | 66.42% | 78.91% | 3.73 | 0.50 |
| 0.34 | 55.30% | 84.60% | 65.58% | 78.10% | 3.59 | 0.53 |
| 0.34 | 53.20% | 84.60% | 64.70% | 77.31% | 3.45 | 0.55 |
| 0.34 | 51.10% | 84.60% | 63.78% | 76.53% | 3.32 | 0.58 |
| 0.34 | 48.90% | 84.60% | 62.75% | 75.73% | 3.18 | 0.60 |
| 0.34 | 46.80% | 84.60% | 61.72% | 74.98% | 3.04 | 0.63 |
| 0.34 | 44.70% | 84.60% | 60.63% | 74.25% | 2.90 | 0.65 |
| 0.34 | 44.70% | 88.50% | 67.35% | 75.10% | 3.89 | 0.62 |
| 0.34 | 42.60% | 88.50% | 66.28% | 74.40% | 3.70 | 0.65 |
| 0.34 | 40.40% | 88.50% | 65.08% | 73.67% | 3.51 | 0.67 |
| 0.34 | 38.30% | 88.50% | 63.86% | 73.00% | 3.33 | 0.70 |
| 0.34 | 36.20% | 88.50% | 62.55% | 72.33% | 3.15 | 0.72 |
| 0.35 | 36.20% | 92.30% | 71.38% | 73.17% | 4.70 | 0.69 |
| 0.35 | 34.00% | 92.30% | 70.09% | 72.49% | 4.42 | 0.72 |
| 0.35 | 31.90% | 92.30% | 68.73% | 71.87% | 4.14 | 0.74 |
| 0.35 | 29.80% | 92.30% | 67.25% | 71.25% | 3.87 | 0.76 |
| 0.35 | 27.70% | 92.30% | 65.62% | 70.64% | 3.60 | 0.78 |
| 0.35 | 25.50% | 92.30% | 63.73% | 70.01% | 3.31 | 0.81 |
| 0.35 | 23.40% | 92.30% | 61.72% | 69.43% | 3.04 | 0.83 |
| 0.36 | 21.30% | 92.30% | 59.48% | 68.85% | 2.77 | 0.85 |
| 0.36 | 21.30% | 96.20% | 74.84% | 69.73% | 5.61 | 0.82 |
| 0.36 | 19.10% | 96.20% | 72.73% | 69.15% | 5.03 | 0.84 |
